# Supplementary material
Source: publisher figshare collection journal article supplement (https://f1000.figshare.com/ndownloader/files/4920583)
Supplement: Supplementary file 1 [file 4920583]

Time (min)	Average Intensity	Standard Deviation
0	0	0
1	13999	6
2	23692	3061
5	27415	940
15	32988	887
